# Supplementary material for: Identification of Tropical Plant Extracts That Extend Yeast Chronological Life Span
Source: MDPI journal article supplement (doi:10.3390/cells10102718), 2021-10-11
Supplement: s1 [file s1]

**Table S1.** Final concentrations of amino acids in SC medium.

| Amino acid      | Final concentration in SC medium (mg/L) |
|-----------------|-----------------------------------------|
| Adenine         | 10                                      |
| L-Arginine HCl  | 50                                      |
| L-Aspartic acid | 80                                      |
| L-Histidine HCl | 20                                      |
| L-Isoleucine    | 50                                      |
| L-Leucine       | 100                                     |
| L-Lysine HCl    | 50                                      |
| L-Methionine    | 20                                      |
| L-Phenylalanine | 50                                      |
| L-Threonine     | 100                                     |
| L-Tyrosine      | 50                                      |
| Uracil          | 20                                      |
| L-Valine        | 140                                     |
| L-Tryptophan    | 140                                     |

**Table S2.** List of 222 plant extracts used for primary CLS assay screen.

| No. | Local Name                      | Scientific Name                           | Family         | Organ       | PE Code |
|-----|---------------------------------|-------------------------------------------|----------------|-------------|---------|
| 1   | Rumput israel                   | <i>Asystasia gangetica</i>                | Acanthaceae    | Stem        | P1 D11  |
| 2   | Rumput israel                   | <i>Asystasia gangetica</i>                | Acanthaceae    | Leaf        | P2 D11  |
| 3   | Bisa ular                       | <i>Barleria lupulina</i>                  | Acanthaceae    | Leaf        | P2 A2   |
| 4   | Belalai gajah                   | <i>Clinacanthus nutans</i>                | Acanthaceae    | Leaf        | P1 G6   |
| 5   | Ganda rusa                      | <i>Gendarussa vulgaris</i>                | Acanthaceae    | Leaf        | P1 C11  |
| 6   | Pecah beling                    | <i>Strobilanthes crispus</i>              | Acanthaceae    | Stem        | P1 H9   |
| 7   | Pecah beling                    | <i>Strobilanthes crispus</i>              | Acanthaceae    | Leaf        | P2 B9   |
| 8   | Pecah beling                    | <i>Strobilanthes crispus</i>              | Acanthaceae    | Stem        | P2 C9   |
| 9   | Balong ayam                     | <i>Celosia argentea</i>                   | Amaranthaceae  | Other       | P1 B7   |
| 10  | Balong ayam                     | <i>Celosia argentea</i>                   | Amaranthaceae  | Leaf        | P1 H11  |
| 11  | Spider Lily                     | <i>Lycoris radiata</i>                    | Amaryllidaceae | Whole       | P2 A12  |
| 12  | Gajus/Cashew                    | <i>Anacardium occidentale</i>             | Anacardiaceae  | Leaf        | P1 F12  |
| 13  | Mango                           | <i>Mangifera indica</i>                   | Anacardiaceae  | Leaf        | P2 G7   |
| 14  | Durian belanda                  | <i>Annona muricata</i>                    | Annonaceae     | Leaf        | P1 D8   |
| 15  | Asoka                           | <i>Polyalthia longifolia var. pendula</i> | Annonaceae     | Leaf        | P1 F1   |
| 16  | Pegaga                          | <i>Centella asiatica</i>                  | Apiaceae       | Leaf        | P3 B6   |
| 17  | Selom                           | <i>Oenanthe javanica</i>                  | Apiaceae       | Leaf & Stem | P1 E7   |
| 18  | Pokok pulai                     | <i>Alstonia angustiloba</i>               | Apocynaceae    | Leaf        | P2 E10  |
| 19  | Lembiaga                        | <i>Calotropis gigantea</i>                | Apocynaceae    | Leaf        | P2 E6   |
| 20  | Kemboja                         | <i>Plumeria acuminata</i>                 | Apocynaceae    | Leaf        | P1 H8   |
| 21  | Susun kelapa/Crepe jasmine      | <i>Tabernaemontana divaricate</i>         | Apocynaceae    | Leaf        | P1 B12  |
| 22  | Susun kelapa                    | <i>Tabernaemontana divaricate</i>         | Apocynaceae    | Stem        | P2 B12  |
| 23  | Yellow oleander                 | <i>Thevetia peruviana</i>                 | Apocynaceae    | Leaf        | P1 E11  |
| 24  | Ekor naga/Dragon Tail           | <i>Epipremnum pinnatum</i>                | Araceae        | Stem        | P1 E9   |
| 25  | Yellow aralia / Miagos bush     | <i>Osmoxylon lineare</i>                  | Araliaceae     | Leaf        | P2 H12  |
| 26  | Pokok Krismas/Star pine         | <i>Araucaria heterophylla</i>             | Araucariaceae  | Leaf        | P2 C10  |
| 27  | Pokok dudar/Fishtail palm       | <i>Caryota mitis</i>                      | Arecaceae      | Leaf        | P2 A10  |
| 28  | Kelapa                          | <i>Cocos nucifera</i>                     | Arecaceae      | Leaf        | P2 F5   |
| 29  | Pinang raja/Pinang merah        | <i>Cyrtostachys renda</i> BL.             | Arecaceae      | Leaf        | P2 F9   |
| 30  | Kelapa sawit/Oil palm           | <i>Elaeis guineensis</i>                  | Arecaceae      | Leaf        | P2 G5   |
| 31  | Palas kipas/Fan palm            | <i>Licuala grandis</i>                    | Arecaceae      | Other       | P1 G9   |
| 32  | Palas kipas / Fan palm          | <i>Licuala grandis</i>                    | Arecaceae      | Leaf        | P3 B5   |
| 33  | Palas                           | <i>Licuala grandis</i>                    | Arecaceae      | Other       | P3 B4   |
| 34  | Palma ekor musang               | <i>Wodyetia bifurcata</i>                 | Arecaceae      | Leaf        | P1 E10  |
| 35  | Kelumpang telur/Carribean agave | <i>Agave angustifolia</i>                 | Asparagaceae   | Leaf        | P2 A6   |
| 36  | Pokok Ti                        | <i>Cordyline fruticosa 'kiwi'</i>         | Asparagaceae   | Other       | P1 A9   |
| 37  | Kapal terbang                   | <i>Chromolaena odorata</i>                | Asteraceae     | Stem        | P2 D5   |
| 38  | Kapal terbang                   | <i>Chromolaena odorata</i>                | Asteraceae     | Other       | P2 C5   |
| 39  | Kapal terbang                   | <i>Eupatorium odoratum</i> Linn           | Asteraceae     | Leaf        | P1 D12  |
| 40  | Beluntas/Indian camphorweed     | <i>Pluchea indica</i>                     | Asteraceae     | Leaf        | P2 G1   |
| 41  | Nodeweed                        | <i>Synedrella nodiflora</i>               | Asteraceae     | Leaf        | P1 D3   |
| 42  | Tambak bukit/Iron Weed          | <i>Vernicia cinerial</i>                  | Asteraceae     | Leaf        | P1 A12  |
| 43  | Pucuk Paku                      | <i>Athyrium esculentum</i>                | Athyriaceae    | Leaf        | P1 H7   |
| 44  | Pucuk paku                      | <i>Athyrium esculentum</i>                | Athyriaceae    | Leaf        | P2 G10  |
| 45  | Daun Belimbing                  | <i>Averrhoa carambola</i>                 | Averrhoa       | Leaf        | P1 A6   |

# Identification of Tropical Plant Extracts that Extend Yeast Chronological Life Span, Kwong et al., 2021.

|    |                               |                                            |                |        |        |
|----|-------------------------------|--------------------------------------------|----------------|--------|--------|
| 46 | Sakura Malaysia               | <i>Tecoma tabebuia</i>                     | Bignoniaceae   | Leaf   | P1 B6  |
| 47 | Nenas                         | <i>Ananas comosus</i>                      | Bromeliaceae   | Other  | P2 E8  |
| 48 | Rhu                           | <i>Casuarina equisetifolia</i>             | Casuarinaceae  | Leaf   | P2 C11 |
| 49 | Manggis                       | <i>Garcinia mangostana</i>                 | Clusiaceae     | Leaf   | P1 E4  |
| 50 | Asam gelugor                  | <i>Garcinia atroviridis</i>                | Clusiaceae     | Other  | P2 B1  |
| 51 | Asam gelugor                  | <i>Garcinia atroviridis</i>                | Clusiaceae     | Fruit  | P2 C1  |
| 52 | Black olive tree              | <i>Bucida buceras</i>                      | Combretaceae   | Leaf   | P1 A4  |
| 53 | Morning glory                 | <i>Turbina corymbosa</i>                   | Convolvulaceae | Leaf   | P2 C8  |
| 54 | Red button ginger             | <i>Costus woodsonii</i>                    | Costaceae      | Leaf   | P2 B11 |
| 55 | Setawar                       | <i>Kalanchoe pinnata</i>                   | Crassulaceae   | Leaf   | P2 G11 |
| 56 | Timun                         | <i>Cucumis sativus</i>                     | Cucurbitaceae  | Other  | P2 F12 |
| 57 | Rumput kyllingia putih        | <i>Cyperus kyllingia</i>                   | Cyperaceae     | Leaf   | P1 E2  |
| 58 | Rabbit's Foot Fern            | <i>Davallia denticulata</i>                | Davalliaceae   | Leaf   | P1 H3  |
| 59 | Pokok mempelas                | <i>Tetracera indica</i>                    | Dilleniaceae   | Leaf   | P2 D10 |
| 60 | Belimbing tanah               | <i>Tacca cristata</i>                      | Dioscoreaceae  | Leaf   | P1 F5  |
| 61 | Seralat/Buah mentega          | <i>Diospyros blancoi</i>                   | Ebenaceae      | Leaf   | P2 F11 |
| 62 | Puding                        | <i>Codiaeum variegatum</i>                 | Euphobiaceae   | Leaf   | P1 B8  |
| 63 | Ara tanah                     | <i>Euphorbia hirta</i>                     | Euphobiaceae   | Leaf   | P1 H1  |
| 64 | Payung Indonesia/Sandbox tree | <i>Hura crepitans</i>                      | Euphobiaceae   | Leaf   | P2 A9  |
| 65 | Mahang                        | <i>Macaranga tanarius</i>                  | Euphobiaceae   | Leaf   | P2 F7  |
| 66 | Balik angin                   | <i>Mallothus biaceae</i>                   | Euphobiaceae   | Leaf   | P2 D1  |
| 67 | Ubi Kayu/Cassava              | <i>Manihot esculenta</i>                   | Euphobiaceae   | Leaf   | P2 G12 |
| 68 | Akasia kuning                 | <i>Acacia auriculiformis</i>               | Fabaceae       | Leaf   | P1 C2  |
| 69 | Akasia kuning                 | <i>Acacia auriculiformis</i>               | Fabaceae       | Other  | P2 A1  |
| 70 | Saga/Red lucky seed           | <i>Adenanthera pavonina</i>                | Fabaceae       | Leaf   | P2 E11 |
| 71 | Jering                        | <i>Archidendron jiringa</i> (Jack) Nielsen | Fabaceae       | Other  | P2 D4  |
| 72 | Gelengang                     | <i>Cassia alata</i>                        | Fabaceae       | Leaf   | P3 A4  |
| 73 | Gelengang                     | <i>Cassia alata</i>                        | Fabaceae       | Stem   | P3 A5  |
| 74 | Gelengang                     | <i>Cassia alata</i>                        | Fabaceae       | Flower | P3 A6  |
| 75 | Gelengang                     | <i>Cassia alata</i>                        | Fabaceae       | Other  | P2 C3  |
| 76 | Rajah kayu                    | <i>Cassia fistula</i>                      | Fabaceae       | Leaf   | P3 B9  |
| 77 | Rajah kayu                    | <i>Cassia fistula</i>                      | Fabaceae       | Stem   | P3 B10 |
| 78 | Rajah kayu                    | <i>Cassia fistula</i>                      | Fabaceae       | Fruit  | P3 B11 |
| 79 | Cassia                        | <i>Cassia garetiana</i>                    | Fabaceae       | Stem   | P3 C7  |
| 80 | Cassia                        | <i>Cassia garetiana</i>                    | Fabaceae       | Fruit  | P3 C8  |
| 81 | Cassia                        | <i>Cassia garetiana</i>                    | Fabaceae       | Leaf   | P3 C9  |
| 82 | Pink shower tree              | <i>Cassia grandis</i>                      | Fabaceae       | Leaf   | P3 B7  |
| 83 | Pink shower tree              | <i>Cassia grandis</i>                      | Fabaceae       | Stem   | P3 B8  |
| 84 | Gelengang                     | <i>Cassia obtusifolia</i> L.               | Fabaceae       | Flower | P3 A7  |
| 85 | Glossy shower                 | <i>Cassia surattensis</i>                  | Fabaceae       | Leaf   | P3 C3  |
| 86 | Glossy shower                 | <i>Cassia surattensis</i>                  | Fabaceae       | Stem   | P3 C4  |
| 87 | Glossy shower                 | <i>Cassia surattensis</i>                  | Fabaceae       | Fruit  | P3 C5  |
| 88 | Glossy shower                 | <i>Cassia surattensis</i>                  | Fabaceae       | Roots  | P3 C6  |
| 89 | Orkid                         | <i>Clitoria fairchildiana</i>              | Fabaceae       | Other  | P1 A8  |
| 90 | Orkid                         | <i>Clitoria fairchildiana</i>              | Fabaceae       | Leaf   | P3 B2  |
| 91 | Giring-giring                 | <i>Crotalaria mucronata</i>                | Fabaceae       | Leaf   | P2 E3  |
| 92 | Nam-Nam                       | <i>Cynometra cauliflora</i>                | Fabaceae       | Leaf   | P1 F7  |
| 93 | Nam-nam                       | <i>Cynometra cauliflora</i>                | Fabaceae       | Stem   | P2 D8  |

# Identification of Tropical Plant Extracts that Extend Yeast Chronological Life Span, Kwong et al., 2021.

|     |                            |                                               |              |             |        |
|-----|----------------------------|-----------------------------------------------|--------------|-------------|--------|
| 94  | Tulang daing               | <i>Millettia artopurpurea</i>                 | Fabaceae     | Leaf        | P1 H5  |
| 95  | Semalu                     | <i>Mimosa pudica</i>                          | Fabaceae     | Leaf & Stem | P1 H4  |
| 96  | Petai kerayong             | <i>Parkia javanica</i>                        | Fabaceae     | Leaf        | P2 E9  |
| 97  | Petai                      | <i>Parkia speciosa</i>                        | Fabaceae     | Leaf        | P1 C3  |
| 98  | Petai                      | <i>Parkia speciosa</i>                        | Fabaceae     | Fruit       | P2 D9  |
| 99  | Jemerlang                  | <i>Peltophorum pterocarpum</i>                | Fabaceae     | Leaf        | P2 C4  |
| 100 | Jemerlang                  | <i>Peltophorum pterocarpum</i>                | Fabaceae     | Other       | P1 G3  |
| 101 | Mempari                    | <i>Pongamia pinnata</i>                       | Fabaceae     | Other       | P1 H6  |
| 102 | Kacang botol               | <i>Psophocarpus tetragonolobus</i>            | Fabaceae     | Leaf        | P2 G4  |
| 103 | Angsana                    | <i>Pterocarpus indicus</i>                    | Fabaceae     | Leaf        | P3 C11 |
| 104 | Hujan-hujan/Pukul lima     | <i>Samanea saman</i>                          | Fabaceae     | Stem        | P1 A11 |
| 105 | Hujan-hujan/Pukul lima     | <i>Samanea saman</i>                          | Fabaceae     | Leaf        | P2 F3  |
| 106 | Christmas cassia           | <i>Senna pendula</i>                          | Fabaceae     | Leaf        | P1 E8  |
| 107 | Christmas cassia           | <i>Senna pendula</i>                          | Fabaceae     | Stem        | P2 G2  |
| 108 | Desert cassia              | <i>Senna polyphylla</i>                       | Fabaceae     | Leaf        | P1 G5  |
| 109 | Pokok Kembang Seberang     | <i>Senna surattensis</i>                      | Fabaceae     | Leaf        | P1 E1  |
| 110 | Geti/turi/hummingbird tree | <i>Sesbania grandiflora</i>                   | Fabaceae     | Leaf        | P2 D3  |
| 111 | Asam jawa/Tamarind         | <i>Tamarindus Indica</i>                      | Fabaceae     | Other       | P1 A5  |
| 112 | Kacang parang/Broad bean   | <i>Vicia faba</i>                             | Fabaceae     | Leaf        | P2 H4  |
| 113 | Melinjau                   | <i>Gnetum gnemon</i>                          | Gnetaceae    | Leaf        | P1 B4  |
| 114 | Pokok bangun-bangun        | <i>Coleus amboinicus</i>                      | Lamiaceae    | Leaf        | P2 G9  |
| 115 | Pudina                     | <i>Mentha x piperita</i>                      | Lamiaceae    | Leaf        | P2 H9  |
| 116 | Selasih                    | <i>Ocimum basilicum</i>                       | Lamiaceae    | Leaf & Stem | P1 C10 |
| 117 | Tulasi/Holy Sacred Basil   | <i>Ocimum tenuiflorum</i>                     | Lamiaceae    | Leaf        | P1 D4  |
| 118 | Bebuas                     | <i>Premna foetida</i>                         | Lamiaceae    | Leaf & Stem | P1 G1  |
| 119 | Jati/Teak                  | <i>Tectona grandis</i>                        | Lamiaceae    | Leaf        | P2 B4  |
| 120 | Halban                     | <i>Vitex Pubescens</i>                        | Lamiaceae    | Leaf        | P1 B3  |
| 121 | Lemuni hitam               | <i>Vitex trifolia var Negundo</i>             | Lamiaceae    | Leaf        | P2 F6  |
| 122 | Lemuni hitam               | <i>Vitex trifolia var Negundo</i>             | Lamiaceae    | Stem        | P2 G6  |
| 123 | Teja/Medang tejar          | <i>Cinnamomum iners</i>                       | Lauraceae    | Leaf        | P1 D2  |
| 124 | Dedalu api                 | <i>Loranthus ferrugineus</i>                  | Loranthaceae | Leaf        | P2 H2  |
| 125 | Delima                     | <i>Punica granatum</i>                        | Lythraceae   | Leaf        | P1 A10 |
| 126 | Berembang                  | <i>Sonneratia caseolaris</i>                  | Lythraceae   | Leaf        | P1 A7  |
| 127 | Berembang                  | <i>Sonneratia caseolaris</i>                  | Lythraceae   | Flower      | P1 B5  |
| 128 | Cempaka putih              | <i>Michelia alba</i>                          | Magnoliaceae | Leaf        | P1 D7  |
| 129 | Durian                     | <i>Durio zibethinus</i>                       | Malvaceae    | Leaf        | P1 D5  |
| 130 | Durian                     | <i>Durio zibethinus</i>                       | Malvaceae    | Other       | P2 A3  |
| 131 | Bunga raya                 | <i>Hibiscus rosa-sinensis</i>                 | Malvaceae    | Leaf        | P2 C2  |
| 132 | Bunga raya                 | <i>Hibiscus rosa-sinensis</i>                 | Malvaceae    | Stem        | P3 A2  |
| 133 | Pokok kasah/Buddha coconut | <i>Pterygota alata</i>                        | Malvaceae    | Leaf        | P2 B10 |
| 134 | Koko                       | <i>Theobroma cacao</i>                        | Malvaceae    | Leaf        | P2 B6  |
| 135 | Bebaru/Portia tree         | <i>Thespesia populnea (L.) Sol. ex correa</i> | Malvaceae    | Leaf        | P2 E1  |
| 136 | Neem/Mambu                 | <i>Azadirachta indica</i>                     | Meliaceae    | Leaf        | P1 G11 |
| 137 | Duku/langsat               | <i>Lansium domesticum</i>                     | Meliaceae    | Leaf        | P1 F10 |
| 138 | Kecapi/Sentul              | <i>Sandoricum koetjape</i>                    | Meliaceae    | Leaf        | P1 C4  |
| 139 | Kecapi/sentul              | <i>Sandoricum koetjape</i>                    | Meliaceae    | Stem        | P2 E5  |
| 140 | Sukun                      | <i>Artocarpus altilis</i>                     | Moraceae     | Leaf        | P1 B1  |
| 141 | Cempedak                   | <i>Artocarpus integer</i>                     | Moraceae     | Leaf        | P1 F2  |
| 142 | Mengkudu                   | <i>Ficus deltoidea</i>                        | Moraceae     | Leaf        | P3 B1  |

# Identification of Tropical Plant Extracts that Extend Yeast Chronological Life Span, Kwong et al., 2021.

|     |                                     |                                  |                  |                    |        |
|-----|-------------------------------------|----------------------------------|------------------|--------------------|--------|
| 143 | Bodhi/Ara Suci                      | <i>Ficus religiosa</i>           | Moraceae         | Leaf               | P1 F11 |
| 144 | Ara                                 | <i>Ficus spp.</i>                | Moraceae         | Leaf               | P3 A1  |
| 145 | Remunggai/Kelor                     | <i>Moringa oleifera</i>          | Moringaceae      | Leaf               | P1 D10 |
| 146 | Remunggai/Kelor                     | <i>Moringa oleifera</i>          | Moringaceae      | Stem               | P1 G4  |
| 147 | Kerukup                             | <i>Muntingia calabura</i>        | Muntingiaceae    | Leaf               | P1 E12 |
| 148 | Ceri kampung/Kerukup siam           | <i>Muntingia calabura</i>        | Muntingiaceae    | Leaf               | P2 E2  |
| 149 | Pala/Nutmeg                         | <i>Myristica fragrans</i>        | Myristicaceae    | Leaf               | P1 C1  |
| 150 | Pala                                | <i>Myristica fragrans</i>        | Myristicaceae    | Stem               | P2 F8  |
| 151 | Jambu Batu Kecil                    | <i>Psidium guajava</i> Linn      | Myrtaceae        | Leaf               | P1 D1  |
| 152 | Jambu laut                          | <i>Syzygium grandis</i>          | Myrtaceae        | Leaf               | P3 A9  |
| 153 | Jambu mawar                         | <i>Syzygium jambos</i>           | Myrtaceae        | Stem               | P2 G3  |
| 154 | jambu mawar                         | <i>Syzygium jambos</i>           | Myrtaceae        | Leaf               | P2 H3  |
| 155 | Paku larat/Giant Sword Fern         | <i>Nephrolepis biserrata</i>     | Nephrolepidaceae | Leaf               | P3 B3  |
| 156 | Bunga kertas/Bougainvillea          | <i>Bougainvillea spp.</i>        | Nyctaginaceae    | Leaf               | P1 H10 |
| 157 | Mengkudu Siam                       | <i>Pisonia grandis</i>           | Nyctaginaceae    | Leaf               | P2 B8  |
| 158 | Melur                               | <i>Jasminum sambac</i>           | Oleaceae         | Leaf               | P2 H7  |
| 159 | Orkid merpati                       | <i>Dendrobium crumenatum</i>     | Orchidaceae      | Leaf               | P1 A3  |
| 160 | Belimbing Buluh/Bilimbi/Tree Sorrel | <i>Averrhoa bilimbi</i>          | Oxalidaceae      | Leaf               | P1 F4  |
| 161 | Belimbing buluh                     | <i>Averrhoa bilimbi</i>          | Oxalidaceae      | Other              | P2 F1  |
| 162 | Mengkuang                           | <i>Pandanus atropurpureus</i>    | Pandanaceae      | Leaf               | P1 F6  |
| 163 | Pandan kuning/Small screwpine       | <i>Pandanus pygmaeus</i>         | Pandanaceae      | Leaf               | P2 G8  |
| 164 | Pandan Wangi                        | <i>Pandanus amaryllifolius</i>   | Pandanaceae      | Leaf               | P2 H8  |
| 165 | Letup-letup/running pop             | <i>Passiflora foetida</i>        | Passifloraceae   | Leaf               | P1 B9  |
| 166 | Yellow turnera                      | <i>Turnera ulmifolia</i>         | Passifloraceae   | Stem               | P3 C12 |
| 167 | Bunga pukul lapan/Yellow alder      | <i>Turnera ulmifolia</i>         | Passifloraceae   | Leaf               | P2 B2  |
| 168 | Cermai                              | <i>Phyllanthus acidus</i>        | Phyllanthaceae   | Leaf               | P1 C6  |
| 169 | Cermai                              | <i>Phyllanthus acidus</i>        | Phyllanthaceae   | Stem               | P2 F2  |
| 170 | Dukung anak                         | <i>Phyllanthus urinaria</i>      | Phyllanthaceae   | Leaf               | P1 B2  |
| 171 | Pine                                | <i>Pinus caribaea</i>            | Pinaceae         | Leaf               | P1 E3  |
| 172 | Pine                                | <i>Pinus caribaea</i>            | Pinaceae         | Other              | P3 A3  |
| 173 | Sireh cina/Pepper elder             | <i>Peperomia pellucida</i>       | Piperaceae       | Leaf, Stem & Roots | P2 H11 |
| 174 | Sireh                               | <i>Piper betle</i>               | Piperaceae       | Leaf               | P1 E5  |
| 175 | Kaduk                               | <i>Piper sarmentosum</i>         | Piperaceae       | Leaf               | P1 C7  |
| 176 | Kaduk                               | <i>Piper sarmentosum</i>         | Piperaceae       | Other              | P2 A5  |
| 177 | Serai                               | <i>Cymbopogon citratus</i>       | Poaceae          | Leaf               | P1 C9  |
| 178 | Rumput sambau/Goosegrass            | <i>Eleusine indica</i>           | Poaceae          | Leaf               | P1 G8  |
| 179 | Buluh madu                          | <i>Gigantochloa albociliata</i>  | Poaceae          | Leaf               | P1 F9  |
| 180 | Tebu                                | <i>Saccharum officinale</i>      | Poaceae          | Leaf               | P1 G10 |
| 181 | Tebu hitam                          | <i>Saccharum officinarum</i>     | Poaceae          | Leaf               | P2 C12 |
| 182 | Ekor tupai                          | <i>Dacrydium beccarii</i>        | Podocarpaceae    | Leaf               | P2 B3  |
| 183 | Anggur laut/Sea grape               | <i>Coccoloba uvifera</i>         | Polygonaceae     | Other              | P1 F3  |
| 184 | Tanduk rusa                         | <i>Phymatosorus scolopendria</i> | Polypodiaceae    | Stem               | P1 A1  |
| 185 | Peria Pantai                        | <i>Colubrina asiatica</i>        | Rhamnaceae       | Leaf               | P1 D9  |
| 186 | Peria Pantai                        | <i>Colubrina asiatica</i>        | Rhamnaceae       | Stem               | P1 B10 |
| 187 | Bidara                              | <i>Ziziphus mauritiana</i>       | Rhamnaceae       | Leaf               | P1 F8  |
| 188 | Bidara                              | <i>Ziziphus mauritiana</i>       | Rhamnaceae       | Stem               | P2 H1  |
| 189 | Kopi                                | <i>Coffea canephora</i>          | Rubiaceae        | Leaf               | P2 C6  |

# Identification of Tropical Plant Extracts that Extend Yeast Chronological Life Span, Kwong et al., 2021.

|     |                                  |                                       |               |             |        |
|-----|----------------------------------|---------------------------------------|---------------|-------------|--------|
| 190 | Jenjarum (kuning)                | <i>Ixora javanica</i> 'yellow'        | Rubiaceae     | Leaf        | P1 C8  |
| 191 | Jenjarum                         | <i>Ixora Siamensis</i>                | Rubiaceae     | Stem        | P1 C5  |
| 192 | Mas cotek/Mistlelog fig          | <i>Morinda citrifolia</i>             | Rubiaceae     | Leaf        | P3 A12 |
| 193 | Mengkudu kecil                   | <i>Morinda elliptica</i>              | Rubiaceae     | Leaf        | P2 A8  |
| 194 | Janda kaya/Virgin tree           | <i>Mussaenda philippica</i> 'aurorae' | Rubiaceae     | Leaf        | P2 A4  |
| 195 | Limau bali/Pamelo                | <i>Citrus grandis</i>                 | Rutaceae      | Leaf        | P1 B11 |
| 196 | Limau kasturi/Calamondin         | <i>Citrus microcarpa</i>              | Rutaceae      | Leaf & Stem | P1 G2  |
| 197 | Limau bali                       | <i>Citrus grandis</i>                 | Rutaceae      | Fruit       | P2 C7  |
| 198 | Limau purut                      | <i>Citrus hystrix</i>                 | Rutaceae      | Fruit       | P2 D7  |
| 199 | Limau kasturi/Calamondin         | <i>Citrus microcarpa</i>              | Rutaceae      | Fruit       | P3 A10 |
| 200 | Lemon                            | <i>Citrus x lemon</i>                 | Rutaceae      | Leaf        | P3 A11 |
| 201 | Rokam manis                      | <i>Flacourtia jangomas</i>            | Salicaceae    | Leaf        | P1 H2  |
| 202 | Mata Kucing/Longan               | <i>Dimocarpus longana</i>             | Sapindaceae   | Leaf        | P1 E6  |
| 203 | Rambutan                         | <i>Nephelium lappaceum</i>            | Sapindaceae   | Other       | P2 F10 |
| 204 | Rambutan                         | <i>Nephelium lappaceum</i>            | Sapindaceae   | Leaf        | P1 C12 |
| 205 | Bunga Tanjung/Spanish Cherry     | <i>Mimusops elengi</i>                | Sapotaceae    | Stem        | P1 A2  |
| 206 | Tongkat ali                      | <i>Eurycoma longifolia</i>            | Simaroubaceae | Stem        | P3 B12 |
| 207 | Terung Pipit                     | <i>Solanum torvum</i>                 | Solanaceae    | Leaf        | P1 G7  |
| 208 | Terung pipit                     | <i>Solanum torvum</i>                 | Solanaceae    | Fruit       | P2 E12 |
| 209 | Mahkota Dewa                     | <i>Phaleria macrocarpa</i>            | Thymelaeaceae | Leaf        | P1 D6  |
| 210 | Cenerai                          | <i>Grewia tomentosa</i>               | Tiliceae      | Other       | P2 D2  |
| 211 | Jolok cacing                     | <i>Stachytarpheta jamaicensis</i>     | Verbenaceae   | Stem        | P2 E4  |
| 212 | Jolok cacing                     | <i>Stachytarpheta jamaicensis</i>     | Verbenaceae   | Leaf        | P2 F4  |
| 213 | Pokok bunga tahi ayam            | <i>Lantana camara</i>                 | Verbenaceae   | Other       | P2 H10 |
| 214 | Lokam gajah/gagnep               | <i>Cayratia mollisima</i>             | Vitaceae      | Leaf        | P2 E7  |
| 215 | Temu lawak                       | <i>Curcuma zanthorrhiza</i>           | Zingiberaceae | Leaf        | P1 G12 |
| 216 | Halia                            | <i>Zingiber officinale</i>            | Zingiberaceae | Rhizome     | P3 A8  |
| 217 | Langkinang                       | <i>Zingiber spectabile</i>            | Zingiberaceae | Leaf        | P2 D6  |
| 218 | Lengkuas (besar)/Greater galanga | <i>Alpinia galanga</i>                | Zingiberaceae | Leaf        | P2 H6  |
| 219 | Lengkuas (besar)/Greater galanga | <i>Alpinia galanga</i>                | Zingiberaceae | Stem        | P2 A7  |
| 220 | Kantan                           | <i>Etlingera elatior</i>              | Zingiberaceae | Leaf        | P2 B5  |
| 221 | Lengkuas putih                   | <i>Alpinia conchigera</i>             | Zingiberaceae | Leaf        | P2 B7  |
| 222 | Pokok pepanjat                   | <i>Liana spp.</i>                     | Unknown       | Other       | P3 C10 |

**Table S3.** Absorbance values ( $A_{600}$ ) of yeast cultures treated with PEs (P1 A1 until P1 H11) at 12<sup>th</sup> h from day 0 to day 6 in primary screen.

| Day | PE    |       |       |       |       |       |       |       |       |        |        |        |
|-----|-------|-------|-------|-------|-------|-------|-------|-------|-------|--------|--------|--------|
|     | P1 A1 | P1 A2 | P1 A3 | P1 A4 | P1 A5 | P1 A6 | P1 A7 | P1 A8 | P1 A9 | P1 A10 | P1 A11 | P1 A12 |
| 0   | 0.515 | 0.491 | 0.486 | 0.516 | 0.465 | 0.471 | 0.510 | 0.483 | 0.518 | 0.558  | 0.509  | 0.563  |
| 2   | 0.629 | 0.672 | 0.643 | 0.615 | 0.618 | 0.645 | 0.662 | 0.633 | 0.602 | 0.556  | 0.533  | 0.499  |
| 4   | 0.508 | 0.588 | 0.511 | 0.515 | 0.547 | 0.511 | 0.566 | 0.523 | 0.496 | 0.477  | 0.444  | 0.417  |
| 6   | 0.433 | 0.534 | 0.433 | 0.431 | 0.396 | 0.474 | 0.460 | 0.418 | 0.505 | 0.446  | 0.430  | 0.450  |
|     | P1 B1 | P1 B2 | P1 B3 | P1 B4 | P1 B5 | P1 B6 | P1 B7 | P1 B8 | P1 B9 | P1 B10 | P1 B11 | P1 B12 |
| 0   | 0.368 | 0.510 | 0.422 | 0.479 | 0.464 | 0.518 | 0.447 | 0.493 | 0.589 | 0.524  | 0.511  | 0.561  |
| 2   | 0.438 | 0.645 | 0.427 | 0.549 | 0.540 | 0.630 | 0.559 | 0.540 | 0.704 | 0.631  | 0.630  | 0.595  |
| 4   | 0.355 | 0.517 | 0.368 | 0.389 | 0.414 | 0.468 | 0.479 | 0.430 | 0.569 | 0.531  | 0.470  | 0.461  |
| 6   | 0.365 | 0.437 | 0.334 | 0.322 | 0.298 | 0.362 | 0.376 | 0.334 | 0.534 | 0.452  | 0.411  | 0.395  |
|     | P1 C1 | P1 C2 | P1 C3 | P1 C4 | P1 C5 | P1 C6 | P1 C7 | P1 C8 | P1 C9 | P1 C10 | P1 C11 | P1 C12 |
| 0   | 0.427 | 0.372 | 0.351 | 0.317 | 0.329 | 0.334 | 0.322 | 0.376 | 0.461 | 0.441  | 0.316  | 0.448  |
| 2   | 0.570 | 0.528 | 0.407 | 0.415 | 0.456 | 0.336 | 0.415 | 0.475 | 0.499 | 0.530  | 0.437  | 0.554  |
| 4   | 0.354 | 0.423 | 0.251 | 0.320 | 0.353 | 0.236 | 0.217 | 0.371 | 0.264 | 0.269  | 0.251  | 0.377  |
| 6   | 0.268 | 0.312 | 0.136 | 0.291 | 0.395 | 0.278 | 0.235 | 0.359 | 0.194 | 0.277  | 0.296  | 0.347  |
|     | P1 D1 | P1 D2 | P1 D3 | P1 D4 | P1 D5 | P1 D6 | P1 D7 | P1 D8 | P1 D9 | P1 D10 | P1 D11 | P1 D12 |
| 0   | 0.441 | 0.362 | 0.384 | 0.319 | 0.279 | 0.457 | 0.327 | 0.295 | 0.513 | 0.403  | 0.463  | 0.444  |
| 2   | 0.551 | 0.526 | 0.546 | 0.430 | 0.388 | 0.491 | 0.393 | 0.507 | 0.475 | 0.506  | 0.525  | 0.524  |
| 4   | 0.428 | 0.287 | 0.263 | 0.184 | 0.185 | 0.234 | 0.166 | 0.287 | 0.242 | 0.191  | 0.186  | 0.332  |
| 6   | 0.413 | 0.203 | 0.195 | 0.105 | 0.116 | 0.148 | 0.117 | 0.149 | 0.268 | 0.190  | 0.148  | 0.278  |
|     | P1 E1 | P1 E2 | P1 E3 | P1 E4 | P1 E5 | P1 E6 | P1 E7 | P1 E8 | P1 E9 | P1 E10 | P1 E11 | P1 E12 |
| 0   | 0.228 | 0.568 | 0.578 | 0.550 | 0.534 | 0.639 | 0.568 | 0.575 | 0.685 | 0.690  | 0.635  | 0.700  |
| 2   | 0.664 | 0.688 | 0.708 | 0.573 | 0.624 | 0.709 | 0.680 | 0.638 | 0.730 | 0.735  | 0.704  | 0.731  |
| 4   | 0.640 | 0.667 | 0.712 | 0.580 | 0.650 | 0.684 | 0.672 | 0.632 | 0.681 | 0.697  | 0.673  | 0.686  |
| 6   | 0.571 | 0.604 | 0.632 | 0.497 | 0.581 | 0.602 | 0.612 | 0.526 | 0.519 | 0.589  | 0.590  | 0.540  |
|     | P1 F1 | P1 F2 | P1 F3 | P1 F4 | P1 F5 | P1 F6 | P1 F7 | P1 F8 | P1 F9 | P1 F10 | P1 F11 | P1 F12 |
| 0   | 0.520 | 0.597 | 0.620 | 0.653 | 0.658 | 0.647 | 0.654 | 0.646 | 0.682 | 0.683  | 0.655  | 0.632  |
| 2   | 0.421 | 0.626 | 0.713 | 0.710 | 0.713 | 0.694 | 0.685 | 0.691 | 0.665 | 0.687  | 0.717  | 0.706  |
| 4   | 0.507 | 0.692 | 0.698 | 0.696 | 0.695 | 0.719 | 0.720 | 0.695 | 0.693 | 0.660  | 0.666  | 0.645  |
| 6   | 0.456 | 0.601 | 0.592 | 0.568 | 0.563 | 0.616 | 0.610 | 0.572 | 0.587 | 0.538  | 0.591  | 0.592  |
|     | P1 G1 | P1 G2 | P1 G3 | P1 G4 | P1 G5 | P1 G6 | P1 G7 | P1 G8 | P1 G9 | P1 G10 | P1 G11 | P1 G12 |
| 0   | 0.471 | 0.493 | 0.549 | 0.516 | 0.489 | 0.506 | 0.438 | 0.530 | 0.589 | 0.580  | 0.553  | 0.532  |
| 2   | 0.457 | 0.622 | 0.693 | 0.723 | 0.662 | 0.621 | 0.578 | 0.704 | 0.588 | 0.721  | 0.658  | 0.649  |
| 4   | 0.393 | 0.420 | 0.598 | 0.621 | 0.531 | 0.585 | 0.459 | 0.581 | 0.426 | 0.549  | 0.563  | 0.589  |
| 6   | 0.323 | 0.414 | 0.516 | 0.545 | 0.498 | 0.526 | 0.425 | 0.506 | 0.414 | 0.530  | 0.454  | 0.459  |
|     | P1 H1 | P1 H2 | P1 H3 | P1 H4 | P1 H5 | P1 H6 | P1 H7 | P1 H8 | P1 H9 | P1 H10 | P1 H11 | DMSO   |
| 0   | 0.550 | 0.577 | 0.581 | 0.609 | 0.631 | 0.560 | 0.614 | 0.585 | 0.607 | 0.590  | 0.605  | 0.569  |
| 2   | 0.564 | 0.626 | 0.665 | 0.683 | 0.732 | 0.618 | 0.666 | 0.640 | 0.710 | 0.663  | 0.633  | 0.696  |
| 4   | 0.571 | 0.548 | 0.546 | 0.557 | 0.596 | 0.475 | 0.556 | 0.520 | 0.573 | 0.533  | 0.608  | 0.577  |
| 6   | 0.470 | 0.440 | 0.432 | 0.447 | 0.538 | 0.447 | 0.454 | 0.497 | 0.476 | 0.438  | 0.466  | 0.535  |

Note: Green highlighted columns indicate absorbance values ( $A_{600}$ ) which are higher than that of the DMSO control culture which is highlighted in blue. The PEs that have higher  $A_{600}$  throughout the ageing period (day 0, 2, 4, 6) are highlighted in orange.

**Table S4.** Absorbance values ( $A_{600}$ ) of yeast cultures treated with PEs (P2 A1 until P2 D11) at 12<sup>th</sup> h from day 0 to day 6 in primary screen.

| Day | PE    |       |       |       |       |        |       |       |       |        |        |        |
|-----|-------|-------|-------|-------|-------|--------|-------|-------|-------|--------|--------|--------|
|     | P2 A1 | P2 A2 | P2 A3 | P2 A4 | P2 A5 | P2 A6  | P2 A7 | P2 A8 | P2 A9 | P2 A10 |        | P2 A12 |
| 0   | 0.612 | 0.634 | 0.602 | 0.445 | 0.490 | -0.002 | 0.630 | 0.623 | 0.658 | 0.622  |        | 0.640  |
| 2   | 0.597 | 0.598 | 0.578 | 0.595 | 0.597 | -0.003 | 0.599 | 0.614 | 0.593 | 0.622  |        | 0.579  |
| 4   | 0.674 | 0.625 | 0.615 | 0.602 | 0.605 | 0.000  | 0.602 | 0.616 | 0.677 | 0.670  |        | 0.705  |
| 6   | 0.684 | 0.644 | 0.632 | 0.615 | 0.624 | -0.001 | 0.613 | 0.642 | 0.663 | 0.679  |        | 0.716  |
|     | P2 B1 | P2 B2 | P2 B3 | P2 B4 | P2 B5 | P2 B6  | P2 B7 | P2 B8 | P2 B9 | P2 B10 | P2 B11 | P2 B12 |
| 0   | 0.625 | 0.627 | 0.629 | 0.532 | 0.545 | 0.597  | 0.606 | 0.616 | 0.611 | 0.626  | 0.624  | 0.632  |
| 2   | 0.539 | 0.555 | 0.590 | 0.551 | 0.575 | 0.559  | 0.547 | 0.603 | 0.543 | 0.577  | 0.566  | 0.585  |
| 4   | 0.608 | 0.631 | 0.640 | 0.604 | 0.388 | 0.591  | 0.596 | 0.645 | 0.616 | 0.663  | 0.684  | 0.671  |
| 6   | 0.674 | 0.646 | 0.652 | 0.610 | 0.577 | 0.670  | 0.605 | 0.666 | 0.604 | 0.649  | 0.639  | 0.678  |
|     | P2 C1 | P2 C2 | P2 C3 | P2 C4 | P2 C5 | P2 C6  | P2 C7 | P2 C8 | P2 C9 | P2 C10 | P2 C11 | P2 C12 |
| 0   | 0.598 | 0.521 | 0.426 | 0.573 | 0.435 | 0.562  | 0.649 | 0.557 | 0.528 | 0.594  | 0.531  | 0.602  |
| 2   | 0.490 | 0.467 | 0.228 | 0.501 | 0.425 | 0.440  | 0.508 | 0.483 | 0.476 | 0.474  | 0.394  | 0.532  |
| 4   | 0.566 | 0.496 | 0.275 | 0.518 | 0.385 | 0.455  | 0.561 | 0.531 | 0.517 | 0.554  | 0.450  | 0.547  |
| 6   | 0.545 | 0.524 | 0.312 | 0.552 | 0.481 | 0.525  | 0.567 | 0.585 | 0.499 | 0.513  | 0.438  | 0.659  |
|     | P2 D1 | P2 D2 | P2 D3 | P2 D4 | P2 D5 | P2 D6  | P2 D7 | P2 D8 | P2 D9 | P2 D10 | P2 D11 | DMSO   |
| 0   | 0.581 | 0.590 | 0.569 | 0.548 | 0.331 | 0.563  | 0.540 | 0.582 | 0.857 | 0.547  | 0.539  | 0.584  |
| 2   | 0.410 | 0.479 | 0.510 | 0.528 | 0.299 | 0.494  | 0.479 | 0.522 | 0.506 | 0.442  | 0.443  | 0.571  |
| 4   | 0.408 | 0.549 | 0.573 | 0.518 | 0.248 | 0.549  | 0.507 | 0.556 | 0.617 | 0.580  | 0.558  | 0.635  |
| 6   | 0.387 | 0.567 | 0.605 | 0.585 | 0.348 | 0.575  | 0.534 | 0.576 | 0.616 | 0.574  | 0.526  | 0.654  |

Note: Green highlighted columns indicate absorbance values ( $A_{600}$ ) which are higher than that of the DMSO control culture which is highlighted in blue. The PEs that have higher  $A_{600}$  throughout the ageing period (day 0, 2, 4, 6) are highlighted in orange.



**Table S5.** Absorbance values ( $A_{600}$ ) of yeast cultures treated with PEs (P2 E1 until P2 H12) at 12<sup>th</sup> h from day 0 to day 6 in primary screen.

| Day | PE    |       |       |       |       |       |       |       |        |        |        |        |
|-----|-------|-------|-------|-------|-------|-------|-------|-------|--------|--------|--------|--------|
|     | P2 E1 | P2 E2 | P2 E3 | P2 E4 | P2 E5 | P2 E6 | P2 E7 | P2 E8 | P2 E9  | P2 E10 | P2 E11 | P2 E12 |
| 0   | 0.564 | 0.581 | 0.670 | 0.678 | 0.636 | 0.670 | 0.655 | 0.665 | 0.684  | 0.650  | 0.649  | 0.664  |
| 2   | 0.363 | 0.346 | 0.573 | 0.537 | 0.377 | 0.588 | 0.568 | 0.587 | 0.564  | 0.595  | 0.491  | 0.565  |
| 4   | 0.456 | 0.401 | 0.562 | 0.562 | 0.568 | 0.607 | 0.603 | 0.592 | 0.538  | 0.604  | 0.556  | 0.573  |
| 6   | 0.486 | 0.364 | 0.600 | 0.576 | 0.610 | 0.572 | 0.590 | 0.609 | 0.586  | 0.681  | 0.642  | 0.702  |
|     | P2 F1 | P2 F2 | P2 F3 | P2 F4 | P2 F5 | P2 F6 | P2 F7 | P2 F8 | P2 F9  | P2 F10 | P2 F11 | P2 F12 |
| 0   | 0.675 | 0.693 | 0.691 | 0.686 | 0.659 | 0.643 | 0.552 | 0.708 | 0.710  | 0.001  | 0.597  | 0.670  |
| 2   | 0.522 | 0.585 | 0.606 | 0.427 | 0.356 | 0.358 | 0.346 | 0.584 | 0.585  | 0.001  | 0.555  | 0.583  |
| 4   | 0.573 | 0.605 | 0.609 | 0.575 | 0.569 | 0.468 | 0.475 | 0.609 | 0.597  | -0.002 | 0.639  | 0.641  |
| 6   | 0.596 | 0.629 | 0.620 | 0.584 | 0.588 | 0.478 | 0.455 | 0.567 | 0.595  | 0.001  | 0.597  | 0.653  |
|     | P2 G1 | P2 G2 | P2 G3 | P2 G4 | P2 G5 | P2 G6 |       | P2 G8 | P2 G9  | P2 G10 | P2 G11 | P2 G12 |
| 0   | 0.578 | 0.566 | 0.564 | 0.391 | 0.314 | 0.513 |       | 0.503 | 0.588  | 0.559  | 0.616  | 0.574  |
| 2   | 0.543 | 0.539 | 0.544 | 0.520 | 0.532 | 0.498 |       | 0.525 | 0.610  | 0.585  | 0.551  | 0.549  |
| 4   | 0.425 | 0.412 | 0.447 | 0.420 | 0.446 | 0.417 |       | 0.411 | 0.488  | 0.494  | 0.464  | 0.535  |
| 6   | 0.494 | 0.411 | 0.421 | 0.473 | 0.473 | 0.447 |       | 0.482 | 0.419  | 0.391  | 0.431  | 0.597  |
|     | P2 H1 | P2 H2 | P2 H3 | P2 H4 | P2 H6 | P2 H7 | P2 H8 | P2 H9 | P2 H10 | P2 H11 | P2 H12 | DMSO   |
| 0   | 0.583 | 0.569 | 0.487 | 0.555 | 0.516 | 0.493 | 0.476 | 0.577 | 0.575  | 0.537  | 0.569  | 0.439  |
| 2   | 0.599 | 0.601 | 0.493 | 0.543 | 0.528 | 0.533 | 0.610 | 0.562 | 0.545  | 0.562  | 0.696  | 0.505  |
| 4   | 0.454 | 0.475 | 0.390 | 0.437 | 0.419 | 0.448 | 0.465 | 0.485 | 0.390  | 0.484  | 0.577  | 0.421  |
| 6   | 0.549 | 0.461 | 0.373 | 0.472 | 0.409 | 0.468 | 0.515 | 0.413 | 0.333  | 0.476  | 0.535  | 0.493  |

Note: Green highlighted column(s) indicate absorbance values ( $A_{600}$ ) which are higher than that of the DMSO control culture which is highlighted in blue. The PEs that have higher  $A_{600}$  throughout the ageing period (day 0, 2, 4, 6) are highlighted in orange.

**Table S6.** Absorbance values ( $A_{600}$ ) of yeast cultures treated with PEs (P3 A1 until P3 C12) at 12<sup>th</sup> h from day 0 to day 6 in primary screen.

| Day  | PE    |       |       |       |       |       |       |       |        |        |        |        |
|------|-------|-------|-------|-------|-------|-------|-------|-------|--------|--------|--------|--------|
|      | P3 A1 | P3 A2 | P3 A3 | P3 A4 | P3 A5 | P3 A6 | P3 A7 | P3 A8 | P3 A9  | P3 A10 | P3 A11 | P3 A12 |
| 0    | 0.717 | 0.698 | 0.674 | 0.707 | 0.727 | 0.620 | 0.660 | 0.691 | 0.719  | 0.751  | 0.740  | 0.693  |
| 2    | 0.689 | 0.662 | 0.586 | 0.596 | 0.591 | 0.480 | 0.534 | 0.630 | 0.641  | 0.700  | 0.674  | 0.693  |
| 4    | 0.738 | 0.695 | 0.606 | 0.638 | 0.642 | 0.510 | 0.531 | 0.665 | 0.642  | 0.719  | 0.710  | 0.753  |
| 6    | 0.506 | 0.594 | 0.495 | 0.563 | 0.580 | 0.487 | 0.406 | 0.313 | 0.549  | 0.614  | 0.644  | 0.581  |
|      | P3 B1 | P3 B2 | P3 B3 | P3 B4 | P3 B5 | P3 B6 | P3 B7 | P3 B8 | P3 B9  | P3 B10 | P3 B11 | P3 B12 |
| 0    | 0.725 | 0.754 | 0.747 | 0.709 | 0.748 | 0.749 | 0.666 | 0.515 | 0.755  | 0.757  | 0.753  | 0.745  |
| 2    | 0.658 | 0.668 | 0.676 | 0.615 | 0.503 | 0.666 | 0.654 | 0.679 | 0.697  | 0.661  | 0.661  | 0.626  |
| 4    | 0.742 | 0.708 | 0.715 | 0.678 | 0.701 | 0.676 | 0.680 | 0.700 | 0.670  | 0.680  | 0.676  | 0.736  |
| 6    | 0.512 | 0.651 | 0.644 | 0.572 | 0.360 | 0.592 | 0.502 | 0.543 | 0.624  | 0.659  | 0.631  | 0.621  |
|      | P3 C1 | P3 C2 | P3 C3 | P3 C4 | P3 C5 | P3 C6 | P3 C7 | P3 C8 | P3 C9  | P3 C10 | P3 C11 | P3 C12 |
| 0    | 0.715 | 0.707 | 0.657 | 0.656 | 0.694 | 0.715 | 0.701 | 0.718 | 0.715  | 0.743  | 0.733  | 0.706  |
| 2    | 0.658 | 0.603 | 0.595 | 0.605 | 0.594 | 0.607 | 0.587 | 0.652 | 0.653  | 0.628  | 0.663  | 0.653  |
| 4    | 0.691 | 0.584 | 0.557 | 0.577 | 0.540 | 0.550 | 0.526 | 0.590 | 0.640  | 0.631  | 0.659  | 0.675  |
| 6    | 0.654 | 0.578 | 0.594 | 0.565 | 0.506 | 0.519 | 0.370 | 0.564 | -0.002 | -0.002 | -0.003 | -0.004 |
| DMSO |       |       |       |       |       |       |       |       |        |        |        |        |
| 0    | 0.728 |       |       |       |       |       |       |       |        |        |        |        |
| 2    | 0.655 |       |       |       |       |       |       |       |        |        |        |        |
| 4    | 0.641 |       |       |       |       |       |       |       |        |        |        |        |
| 6    | 0.533 |       |       |       |       |       |       |       |        |        |        |        |

Note: Green highlighted column(s) indicate absorbance values ( $A_{600}$ ) which are higher than that of the DMSO control culture which is highlighted in blue. The PEs that have higher  $A_{600}$  throughout the ageing period (day 0, 2, 4, 6) are highlighted in orange.

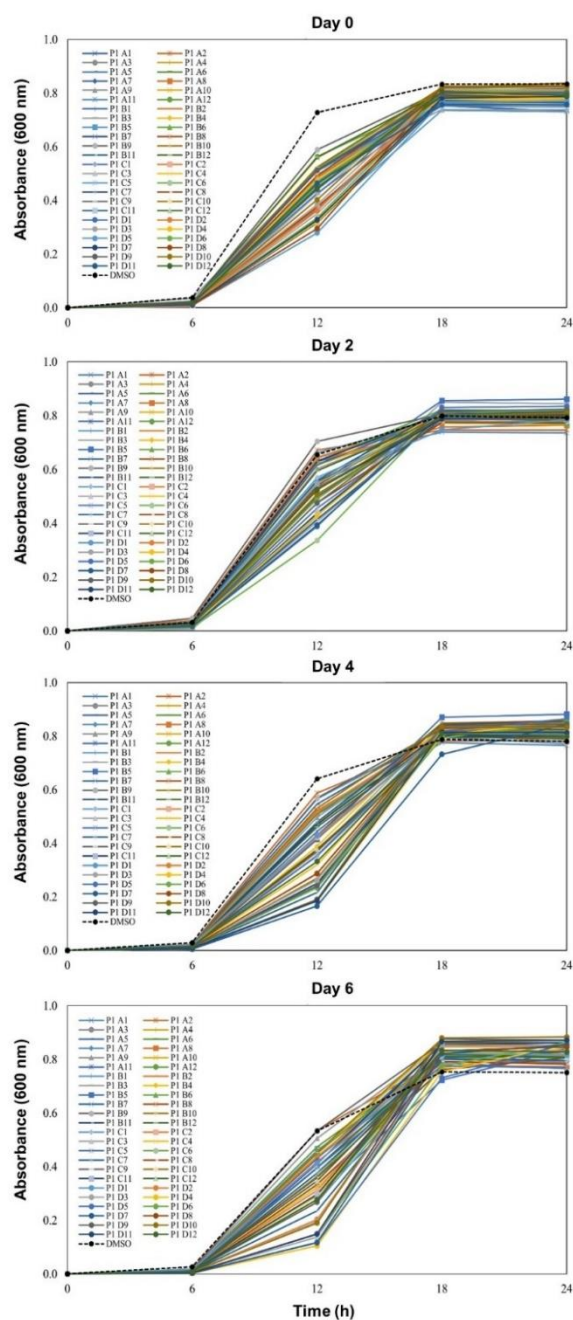

**Figure S1.** CLS outgrowth curves of yeast treated with PEs (P1 A1 until P1 D12) in primary screen. Yeast cells of strain 1783 treated with various PEs at final concentration of 100  $\mu\text{g}/\text{mL}$  or DMSO control were aged in a 96-well microplate containing SC media for 8 days. A small aliquot of aged culture was transferred to a new 96- microplate containing fresh YPD medium for 24 h of outgrowth every two days of ageing. The absorbances ( $A_{600}$ ) were recorded using Bio Microplate Reader HiTS every 6 h. Growth curves of absorbance against time of outgrowth were plotted. Three biological replicates of each culture were prepared.

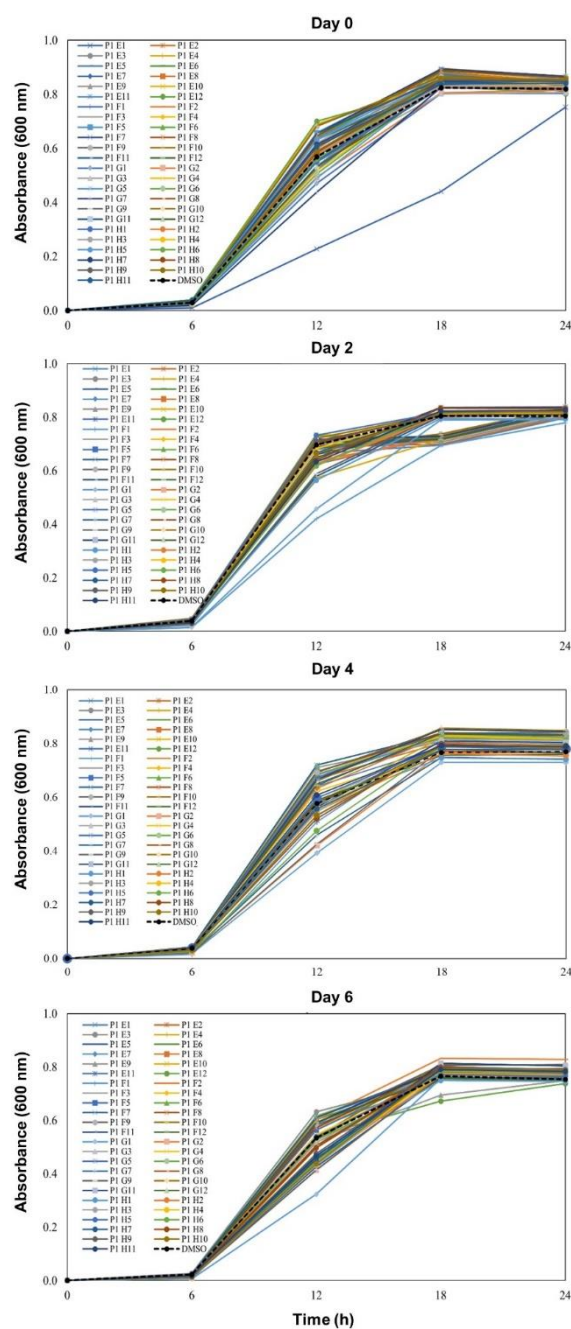

**Figure S2.** CLS outgrowth curves of yeast treated with PEs (P1 E1 till P1 H11) in primary screen. The CLS outgrowth method was repeated as described in Figure S1 for primary screen.

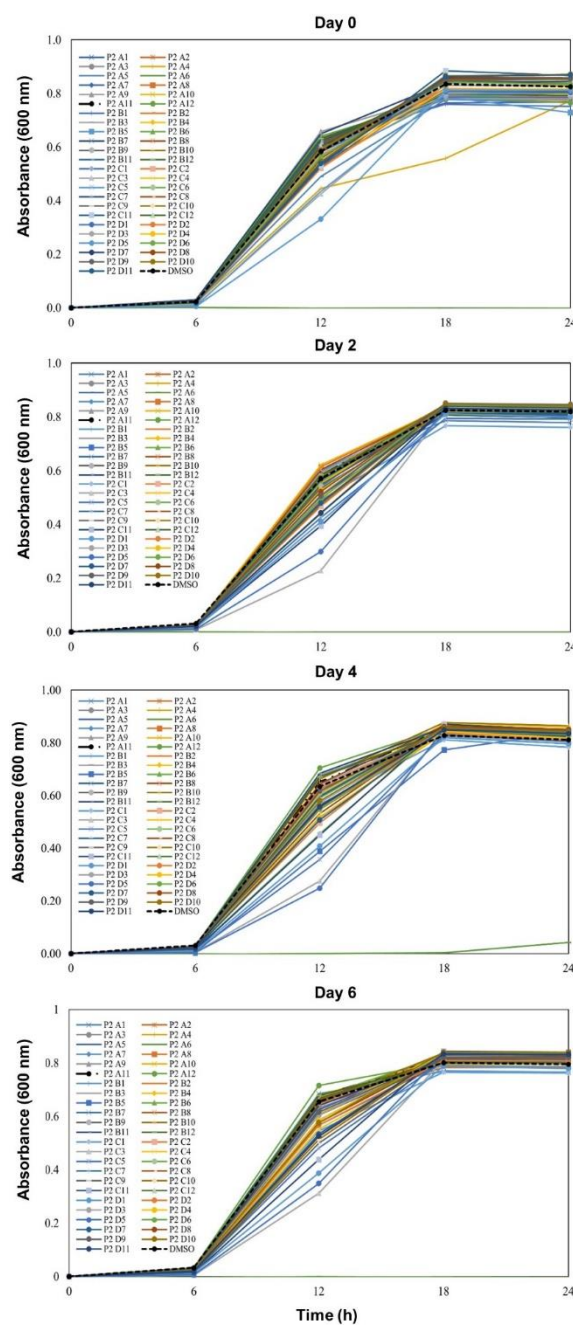

**Figure S3.** CLS outgrowth curves of yeast treated with PEs (P2 A1 until P2 D11) in primary screen. The CLS outgrowth method was repeated as described in Figure S1 for primary screen.

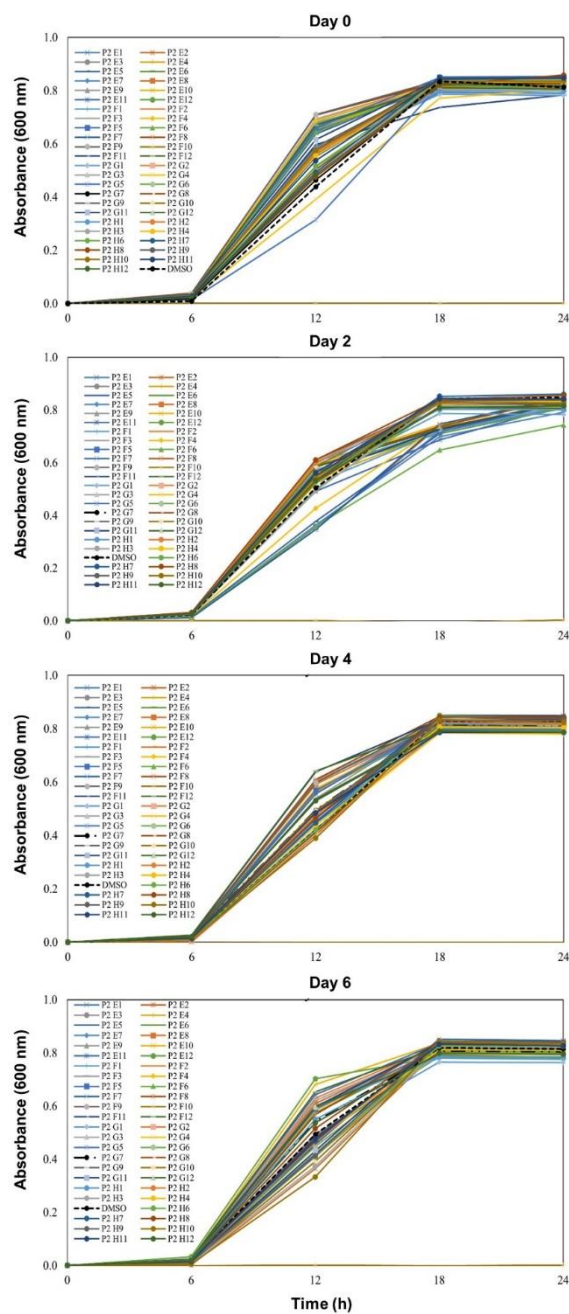

**Figure S4.** CLS outgrowth curves of yeast treated with PEs (P2 E1 until P2 H12) in primary screen. The CLS outgrowth method was repeated as described in Figure S1 for primary screen.

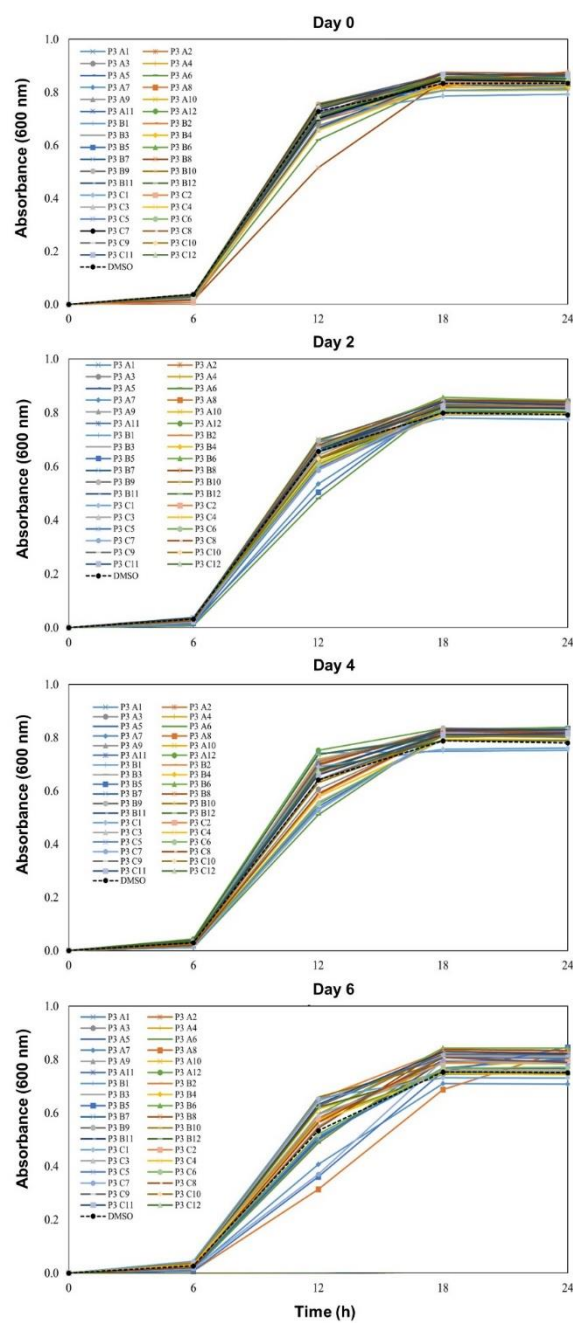

**Figure S5.** CLS outgrowth curves of yeast treated with PEs (P3 A1 until P3 C12) in primary screen. The CLS outgrowth method was repeated as described in Figure S1 for primary screen.



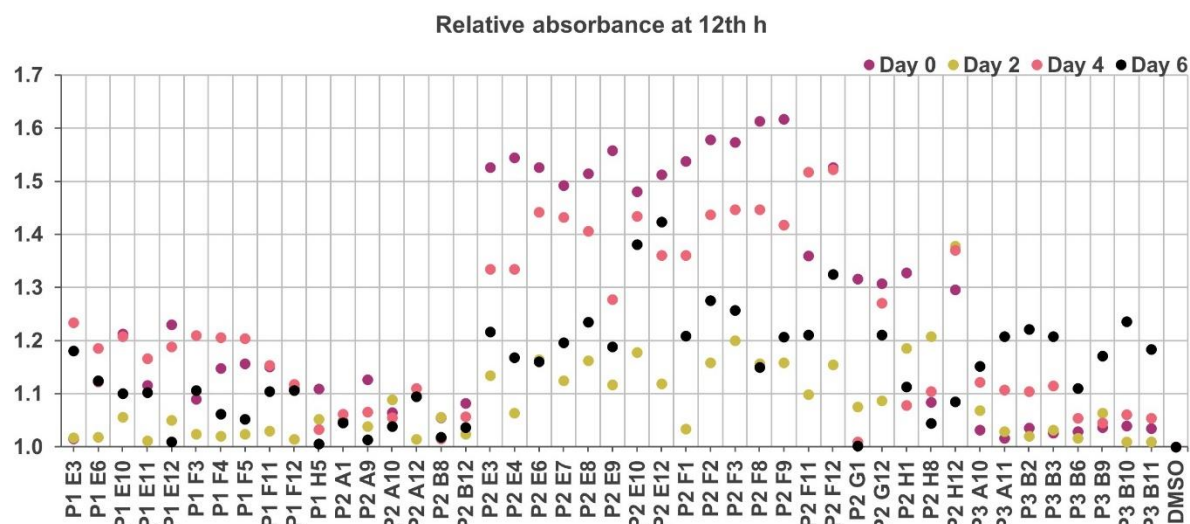

**Figure S6.** Relative absorbance values ( $A_{600}$ ) of 45 PEs-treated cultures which are higher than that of the DMSO control culture at 12<sup>th</sup> h from day 0 to day 6 in primary screen. The CLS outgrowth method performed was described as in Figure S1 for primary screen. The relative absorbance values were calculated by dividing the PE-treated cultures' average outgrowth absorbance readings at 12<sup>th</sup> h to that of the DMSO control culture.



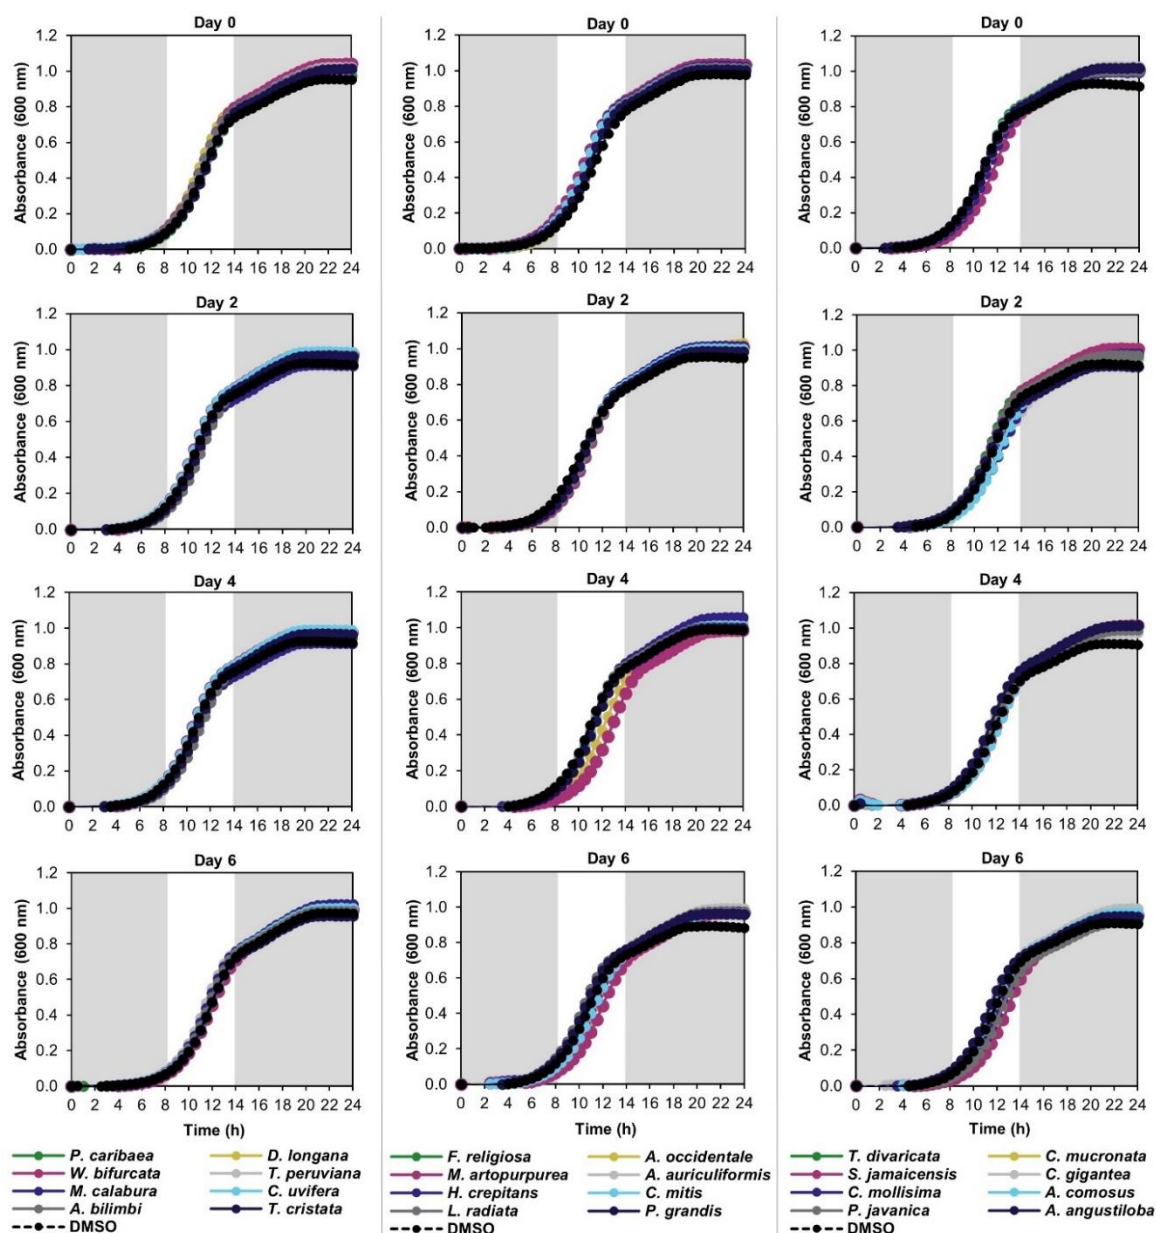

**Figure S7.** CLS outgrowth curves of yeast treated with PEs in secondary screen. Yeast cells of strain 1783 treated with various PEs selected from primary screen at final concentration of 100  $\mu\text{g/mL}$  or DMSO control were aged in a 96-well microplate containing SC media for 8 days. A small aliquot of aged culture was transferred to a new 96- microplate containing fresh YPD medium for 24 h of outgrowth on every two days of ageing. The absorbances ( $A_{600}$ ) were recorded using Bio Microplate Reader HiTS every 30 min up to 24 h. Growth curves of absorbance against time of outgrowth were plotted. Three biological replicates of each culture were prepared.

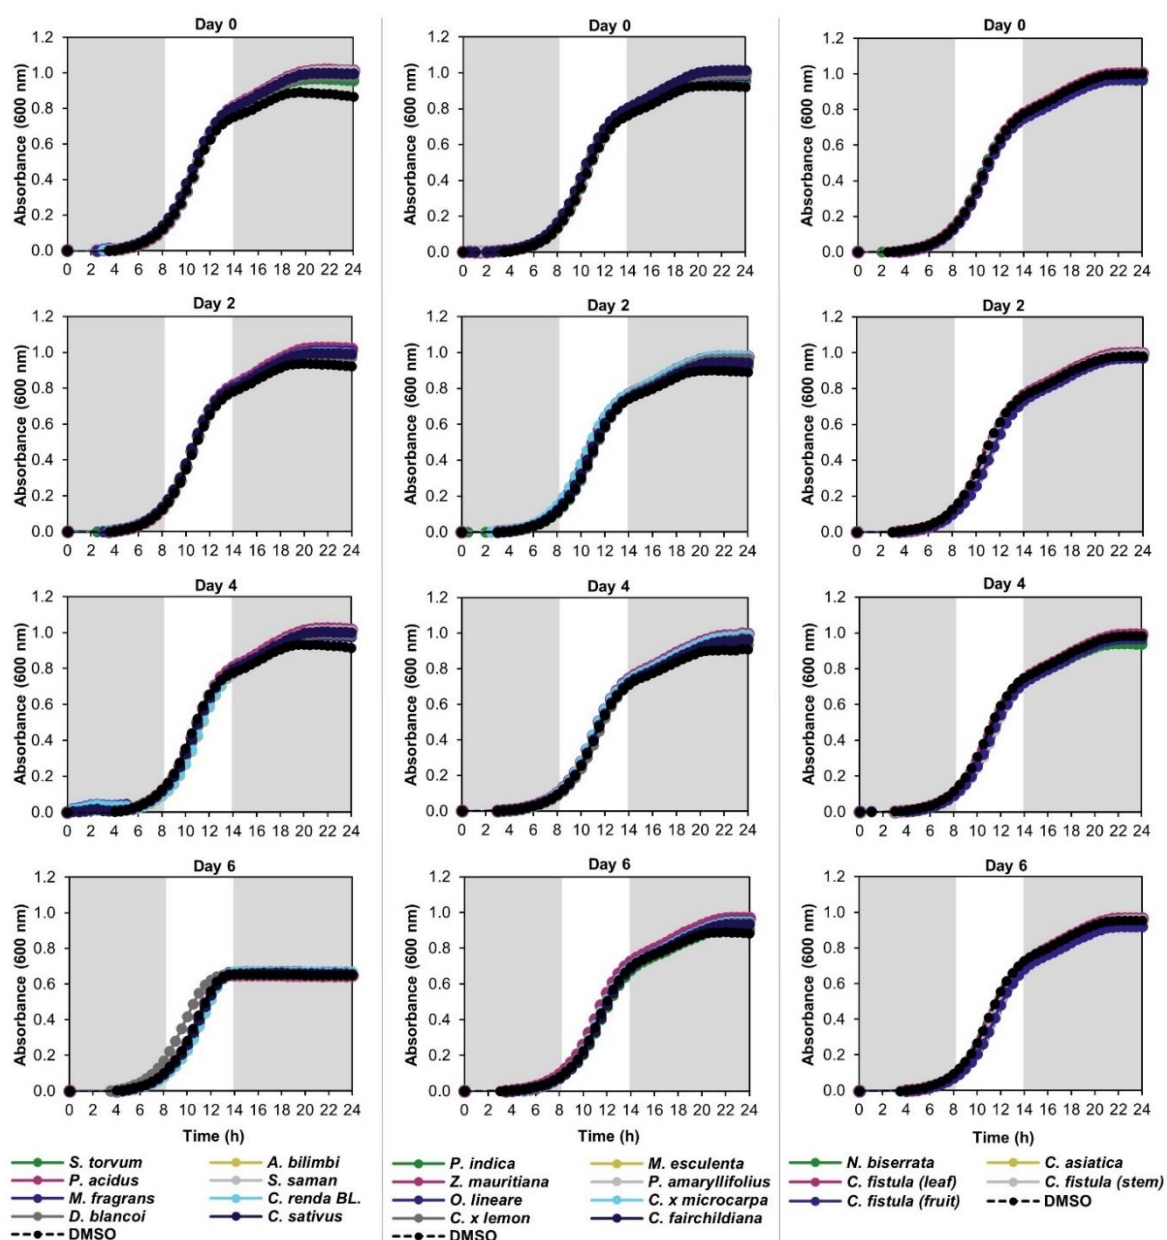

**Figure S8.** CLS outgrowth curves of yeast treated with PEs in secondary screen. The CLS outgrowth method was repeated as described in Figure S7 for secondary screen.

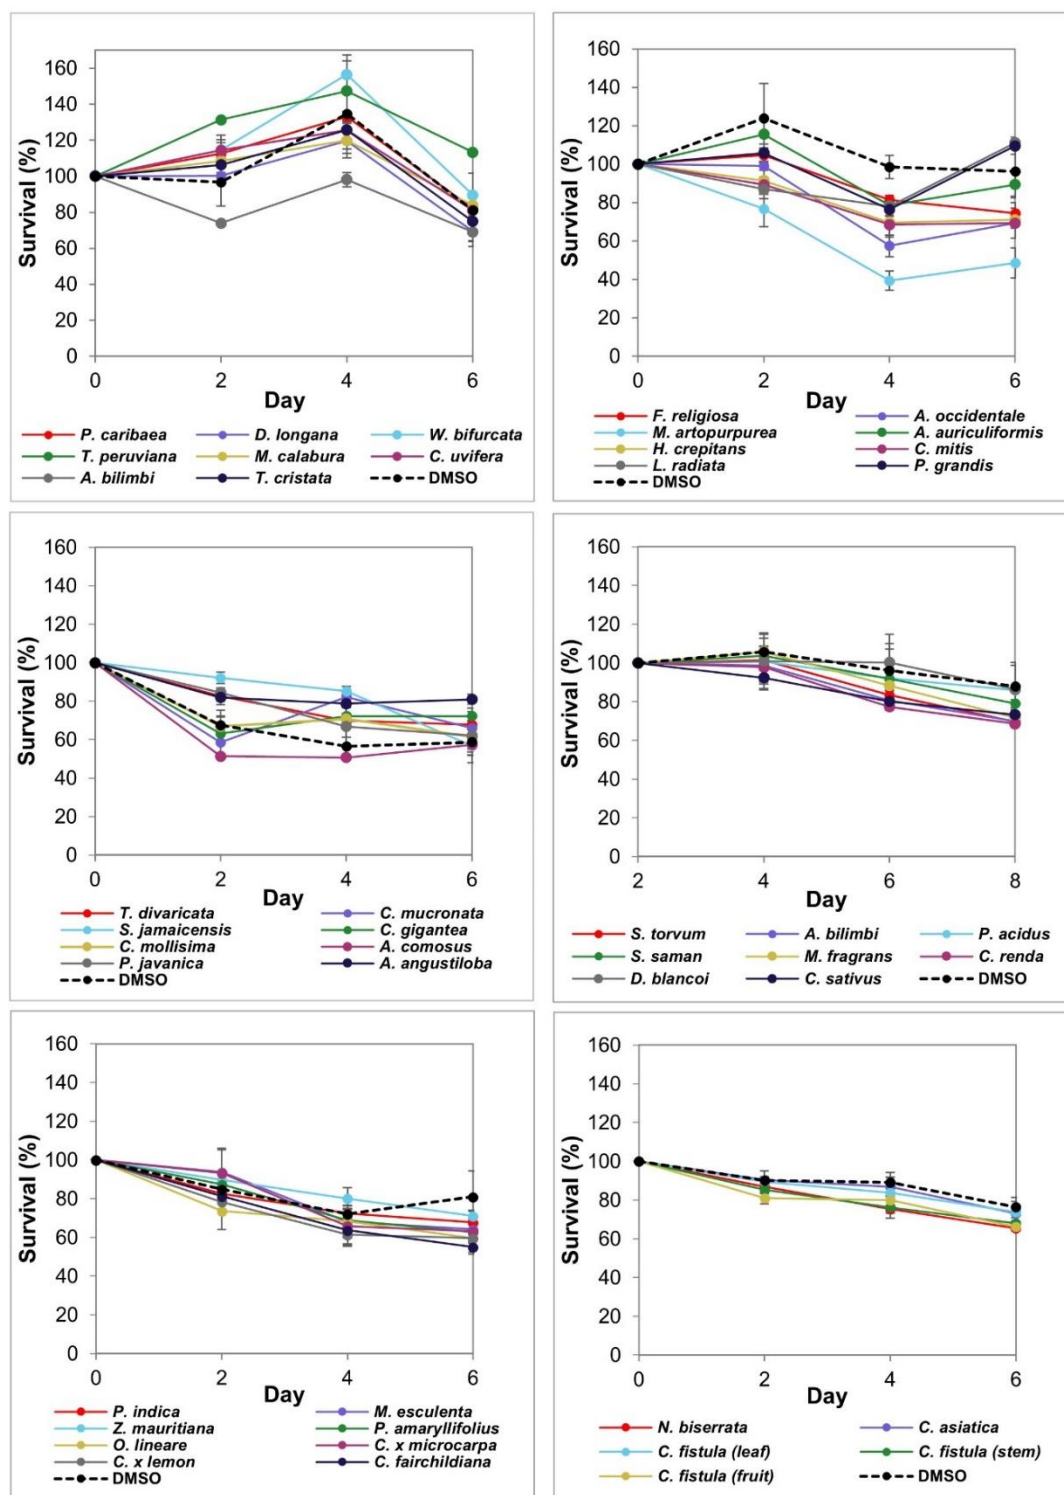

**Figure S9.** Survival of yeast treated with 45 PEs in secondary screen. The CLS outgrowth method was described as in Figure S7 for secondary screen. Absorbance readings ( $A_{600}$ ) from Figure S7 and Figure S8 were analysed and converted to a survival curves. Error bars represent the SEM of three biological replicates.

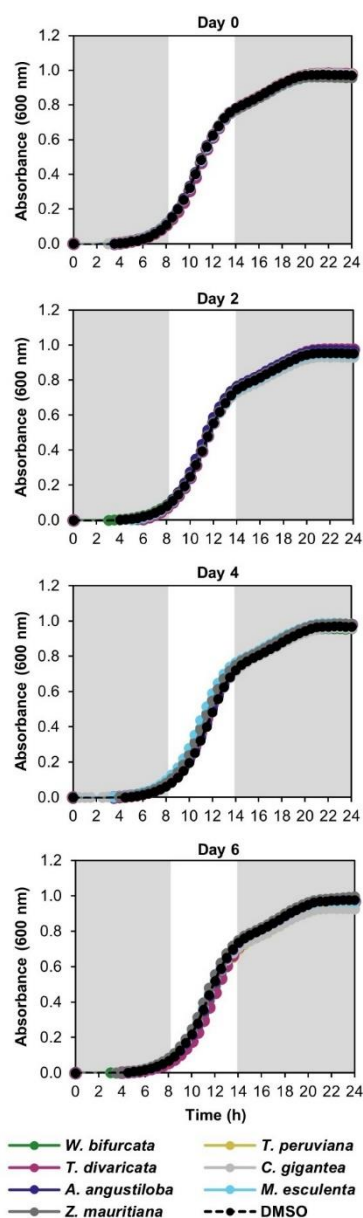

**Figure S10.** CLS outgrowth curves of yeast treated with seven PEs in confirmatory screen. Yeast cells of strain 1783 treated with various PEs selected from secondary screen at final concentration of 100  $\mu\text{g/mL}$  or DMSO control were aged in a 96-well microplate containing SC media for 8 days. A small aliquot of aged culture was transferred to a new 96- microplate containing fresh YPD medium for 24 h of outgrowth on every two days of ageing. The absorbances ( $A_{600}$ ) were recorded using Bio Microplate Reader HiTS every 30 min up to 24 h. Growth curves of absorbance against time of outgrowth were plotted. Three biological replicates of each culture were prepared.

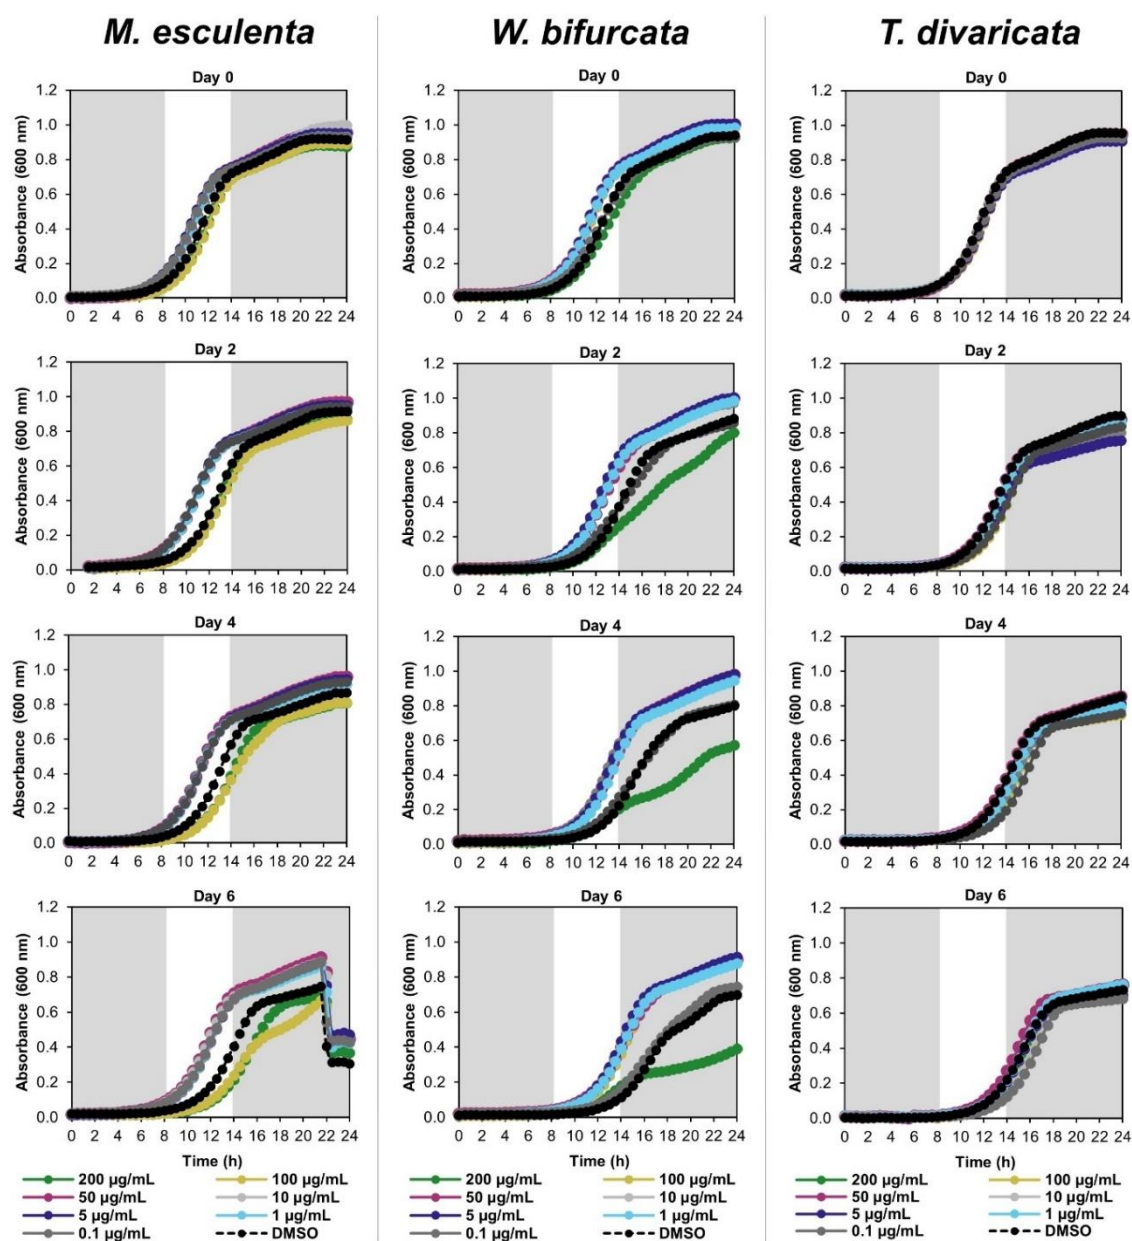

**Figure S11.** CLS outgrowth curves of yeast treated with three PEs in dose-dependent assay. Yeast cells of strain 1783 treated with *M. esculenta*, *W. bifurcata* or *T. divaricata* leaf extract in a range of concentrations (0.1 µg/mL – 200 µg/mL), or DMSO control were aged in bijou bottles containing SC media for 8 days. A small aliquot of each aged culture was transferred to a 96-well microplate containing YPD medium for 24 h of outgrowth on every two days of ageing. The absorbances ( $A_{600}$ ) were recorded using Bio Microplate Reader HiTS every 30 min up to 24 h. Growth curves of absorbance against time of outgrowth were plotted. Three biological replicates of each culture were prepared.



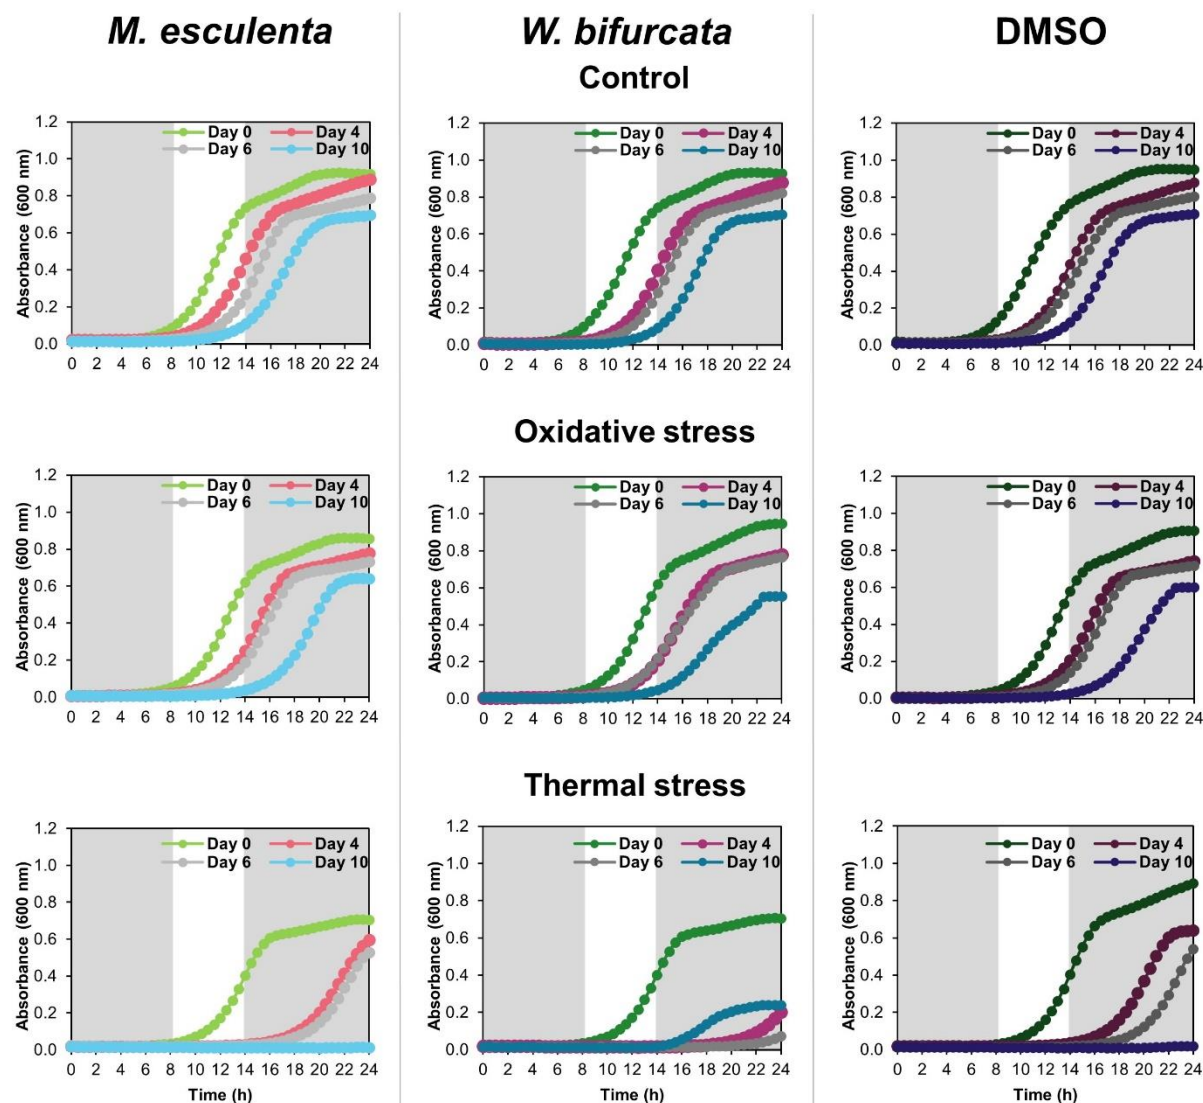

**Figure S12.** CLS outgrowth curves of yeast treated with two PEs in stress assays. Yeast cells of strain 1783 treated with *M. esculenta* or *W. bifurcata* leaf extract at optimal final concentration of 50  $\mu\text{g/mL}$  and 10  $\mu\text{g/mL}$  respectively or DMSO control were aged in bijou bottles for 12 days. At each age point, a small volume of aged yeast cells was exposed to oxidative stress by being treated with 3 mM  $\text{H}_2\text{O}_2$  for 1 h at 30°C or thermal stress at 55°C for 20 min. An aliquot of each nonstress- or stress-treated culture was transferred to a 96-well microplate containing YPD medium for 24 h of outgrowth on day 0, 4, 6 and 10. The absorbances ( $A_{600}$ ) were recorded using Bio Microplate Reader HiTS every 30 min up to 24 h. Growth curves of absorbance against time of outgrowth were plotted. Three biological replicates of each culture were prepared.
